# Supplementary material
Source: publisher figshare collection journal article supplement (https://acs.figshare.com/ndownloader/files/3866833)

## Supporting Information:

### High-Efficiency Plasmon-Enhanced Graphene-Supported Semiconductor/Metal Core-Satellite Heteronano-crystal Photocatalysts for Visible-Light Dye Photodegradation and H<sub>2</sub> Production from Water

Jie Zhang, Ping Wang, Jian Sun, and Yongdong Jin\*

State Key Laboratory of Electroanalytical Chemistry, Changchun Institute of Applied Chemistry, Chinese Academy of Sciences, Changchun, Jilin 130022, P. R. China. E-mail: ydjin@ciac.ac.cn

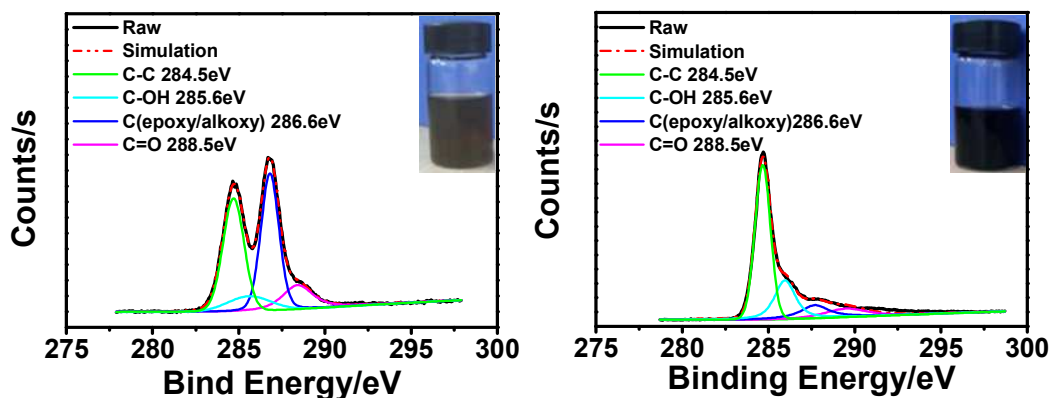

**Figure S1.** C1s XPS spectra of GO (left) and G (right). For G, the intensities of all C1s peaks of the carbon binding to oxygen, especially the peak of C-O (epoxy and alkoxy), decreased dramatically relative to that of GO, indicating that most of the oxygen-containing functional groups on G were removed after the reduction. Inset: Photograph of GO (left) and G (right) solution in DMF.

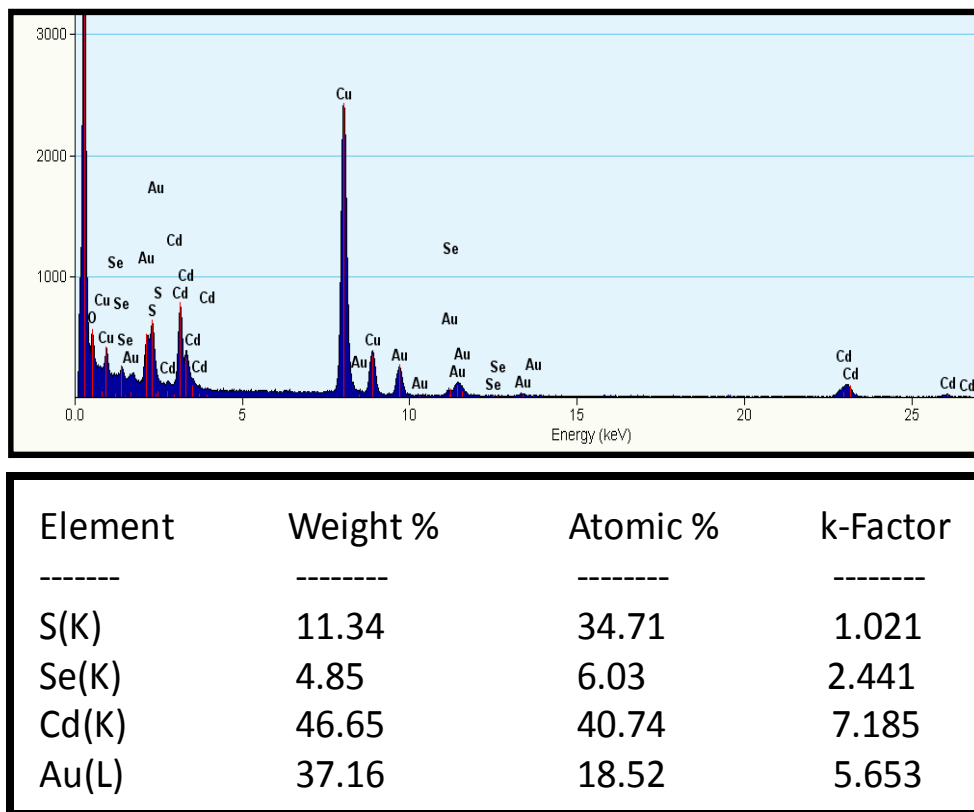

**Figure S2.** EDS spectra (top) and the calculated atomic ratio (AT) (bottom) of the CdSe/CdS/Au HNCs.

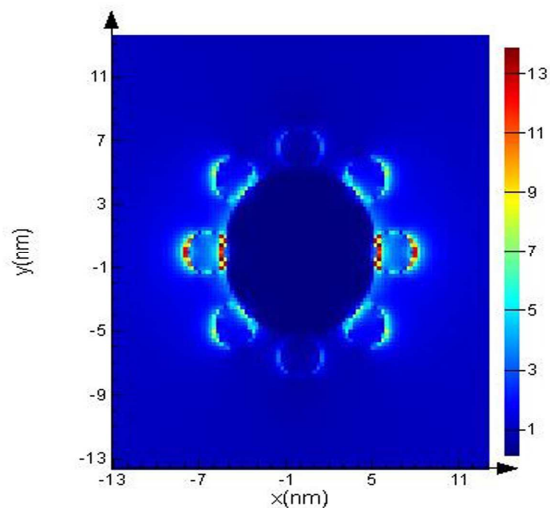

**Figure S3.** Electric field distributions of the as-prepared CdSe/CdS-Au HNCs calculated using the FDTD method.

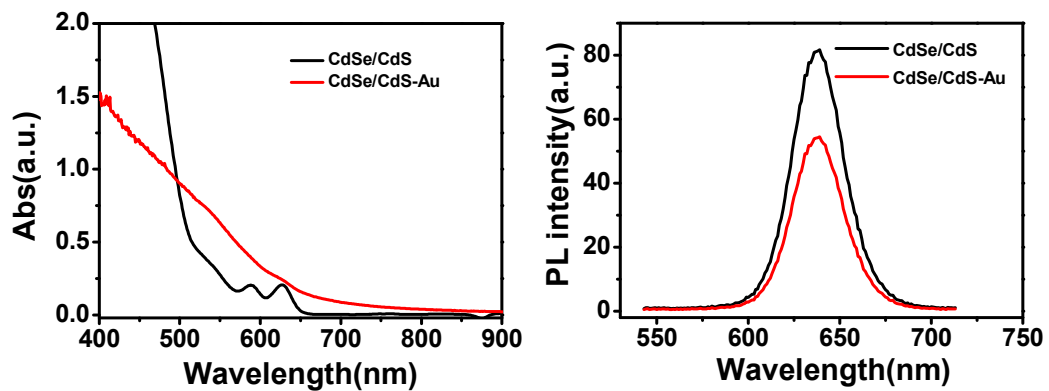

**Figure S4.** The absorption (left) and PL spectra (right) of the QDs and QD-AuNPs mixture.

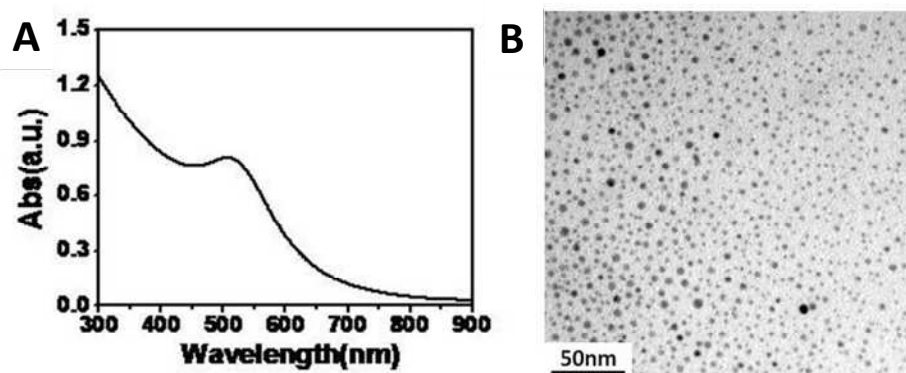

**Figure S5.** The absorption spectrum (a) and TEM image (b) of the control AuNPs used.

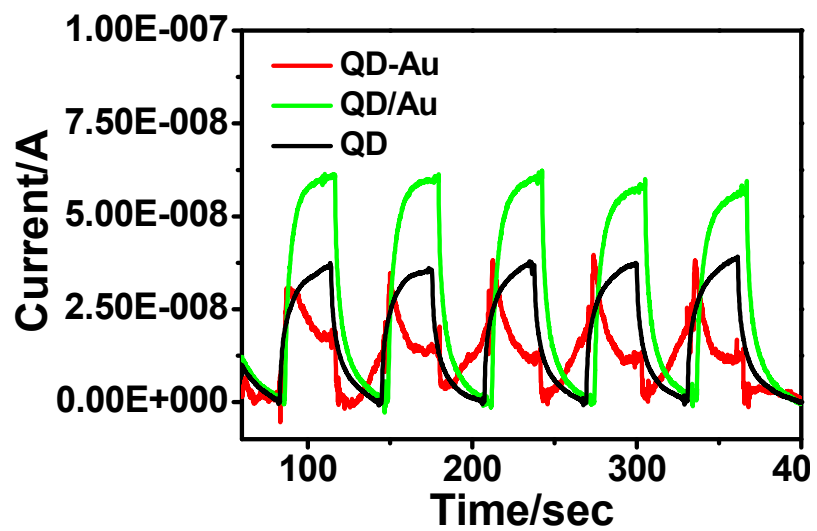

**Figure S6.** The photocurrent responses of the QD, QD/Au HNC, QD and Au mixed nanoparticles under visible light using  $\text{NaNO}_3$  (0.1M) as electrolyte solution.

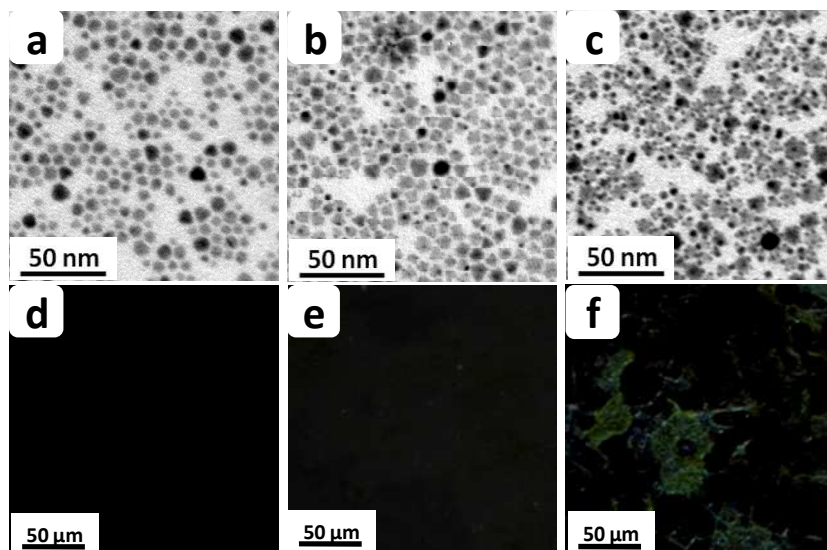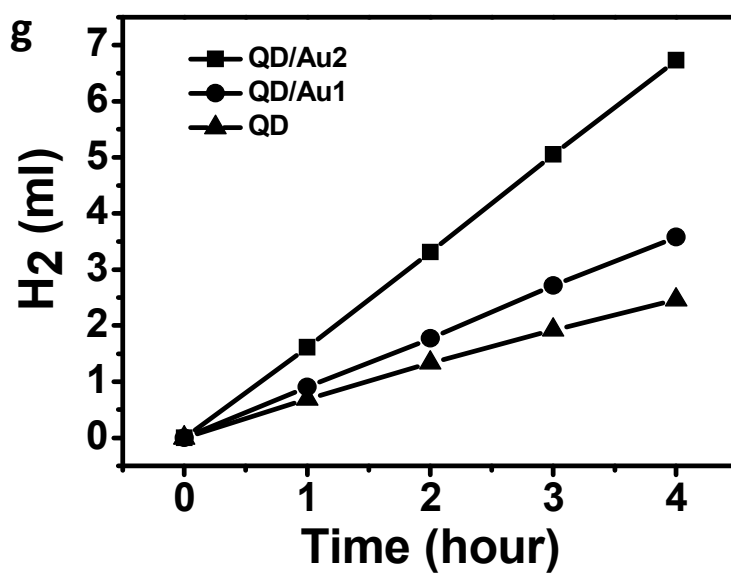

Figure S7. The TEM (a, b, c) and corresponding dark field scattering images (d, e, f) of QD, QD/Au1, QD/Au2, respectively; (g) The  $H_2$  production rate of QD, QD/Au1, QD/Au2, respectively.

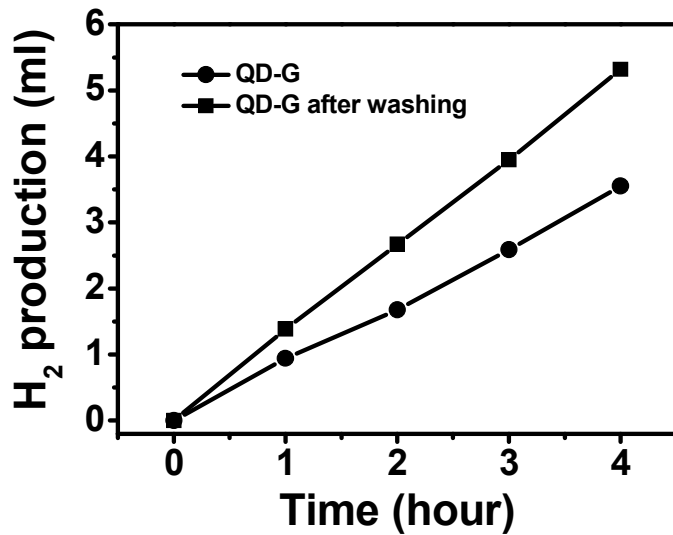

**Figure S8.** The H<sub>2</sub> production rate of the as-prepared QD-G complexes before and after the washing treatment.

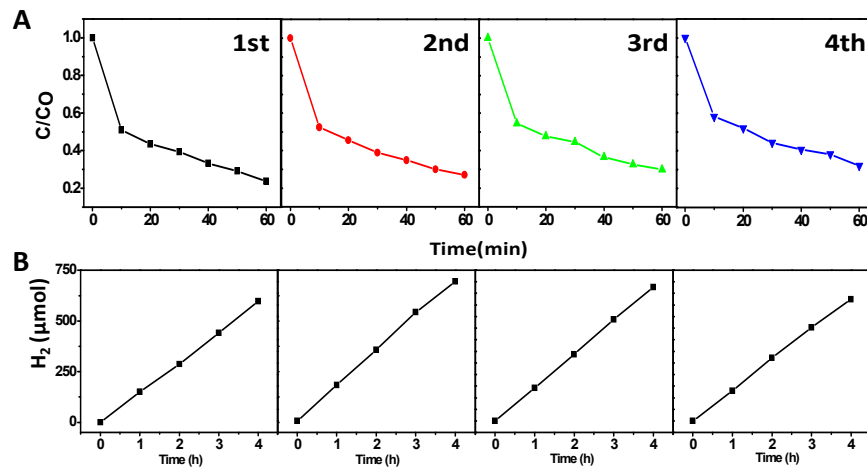

**Figure S9.** Cycling runs in the photodegradation of methylene blue (A) and photocatalytic H<sub>2</sub> production from water (B) in the presence of QD/Au-G sample under visible light.

**The role of sacrificial electron donor (Na<sub>2</sub>S and Na<sub>2</sub>SO<sub>3</sub>):**

Under visible light irradiation, hydrogen was evolved from an aqueous solution containing Na<sub>2</sub>S and Na<sub>2</sub>SO<sub>3</sub>, because of the strong reduction capacity of S<sup>2-</sup> ions, the

photogenerated holes irreversibly oxidize the  $S^{2-}$  ions instead of water. Different reactions occurred for the whole procedure can be represented as follows:

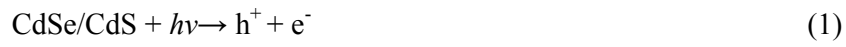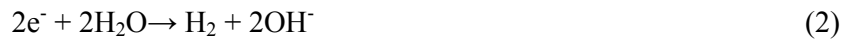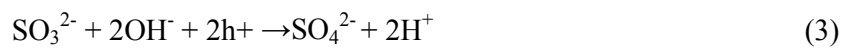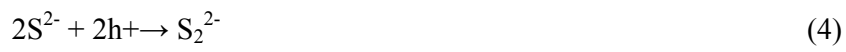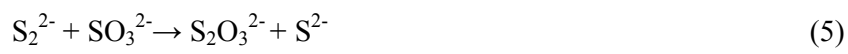

Supplement: Supplementary file 1 [file 3866833]
